# Supplementary material for: Analysis of Genes Involved in Ulcerative Colitis Activity and Tumorigenesis Through Systematic Mining of Gene Co-expression Networks
Source: Front Physiol. 2019 May 31;10:662. doi: 10.3389/fphys.2019.00662 (PMC6554330; doi:10.3389/fphys.2019.00662)
Supplement: Supplementary file 2 [file Table_2.xls]

## Sheet: Sheet1
MEbrown module	MEgreen module
ACKR1	MARCH_7
CCL19	AASS
CD19	AFF4
CD274	AGFG1
CD52	AKT2
CPNE5	ALCAM
CXCL10	AP2A1
CXCL11	ARHGAP1
CXCL9	ARHGEF12
FCER1G	ARIH1
GBP5	ARSB
GPR18	ATF2
GPR183	ATP2C1
GZMB	ATP5J
HCLS1	ATXN2L
IDO1	BAGE
LAMP3	BLZF1
LAX1	BTNL2
LTF	C5orf24
LY96	C6orf25
MMP9	CACUL1
MZB1	CANX
PI3	CDC42BPB
S100A12	CDK9
S100A8	CDS2
S100A9	CEPT1
SASH3	CFL1
SLA	CHST3
TNFRSF17	CLIC1
TNFSF13B	CLIP1
VCAM1	CLTC
MARCH_4	CMIP
ABCC8	CNOT3
ACER1	CNOT4
ACR	COBLL1
ACRBP	COPA
ACTN2	COPB2
ACTN3	CXXC1
ADAM11	DAPK3
ADAM6	DDHD1
ADAM7	DEFB108B
ADAMTS13	DICER1
ADAMTSL1	DIP2B
ADAMTSL2	DNAJC10
ADCY10	DNAJC21
ADGB	DOCK4
ADPRHL1	DOCK9
ADRA2B	DR1
AGAP3	DYNC1H1
AIPL1	DYRK1A
AK5	EIF4G2
ALB	EIF5A2
ALOX12B	ELK4
ALX1	ENGASE
AMHR2	ERI1
AMZ1	FAF2
ANGPTL7	FAM160B1
ANKRD13B	FBXW8
ANKRD24	FKBP8
ANKRD7	FNDC3B
APC2	FOXK2
APCS	FTH1P5
AQP6	G3BP1
ARHGEF15	GJA4
ARL4D	GMEB2
ARMC5	GPATCH2L
ASB16	GPR180
ASIC2	GTPBP10
ASIC4	HCFC1
ASPDH	HEY1
ASXL3	HGSNAT
ATOH8	HIP1R
ATP2B3	HIPK1
ATP4B	HIST1H1E
AVPR1B	HIST1H2BM
B4GALNT4	HIST1H3I
BAHCC1	HIST1H4L
BAIAP3	HS3ST3A1
BARHL1	HSD17B12
BCAN	IKBKG
BIRC7	ITGB1
BPIFB2	KAT6A
BRICD5	KIAA1549
BSND	KRT40
C10orf95	KRTAP3-2
C11orf42	KRTAP3-3
C12orf54	KXD1
C16orf71	LATS1
C16orf82	LIMD2
C19orf45	LIMS1
C1orf64	LINC00314
C1orf68	LMAN2
C1orf94	LOC100130331
C21orf62	LOC400590
C2orf57	LOC441178
C6orf52	LOC441666
C7orf33	LRP1
C8orf74	LRRC41
C9orf172	LRRC58
CA6	LRRC59
CABP7	LY6G6E
CABYR	MAN1A2
CACNA1B	MBD2
CACNA1I	MCFD2
CACNG2	MDM2
CACNG3	MED13L
CACNG4	MED24
CACNG5	MED25
CADM4	MEX3C
CALCR	MIDN
CALR3	MSI2
CAMK2B	MT2A
CAMKK1	MTA2
CAMKV	MTHFD1L
CASKIN1	MTHFD2
CASR	MTSS1L
CBLN4	MZF1
CCDC13	NAA30
CCDC153	NACAP1
CCDC154	NBAS
CCDC173	NCDN
CCDC182	NCLN
CCDC28B	NDUFB3
CCDC63	NEK6
CCER1	NF2
CCKAR	NME7
CCKBR	NPC1
CDH15	NSD1
CDH22	NUS1
CEACAM19	OLFM2
CECR2	OR10C1
CHRNA2	OR11A1
CHRNA4	OR14J1
CHRNB2	OR2B3
CHRND	OR2J3
CIRBP-AS1	OR2W1
CLCN1	OSBPL10
CLDN19	PACS2
CLPS	PAFAH1B2
CLRN1	PDE4DIP
CMTM5	PDZD11
CNBD2	PGAM5
CNGA4	PGD
CNPY1	PGM3
CNTFR	PIK3C2A
CNTNAP5	PMS1
COL20A1	PNRC2
COL26A1	POLR2A
COMMD5	POLR2J
CPLX2	POLR3E
CPLX3	POMK
CPNE6	PPP1R2
CPNE7	PPP3R1
CPS1-IT1	PRKACA
CRYGC	PSMB2
CSNK1G2-AS1	PTMA
CST4	PTPN1
CST8	PTPN11
CTRC	PURB
CYP17A1	R3HCC1
CYP1A2	RAB11B
CYP2A7P1	RAB3GAP2
CYP2D6	RAB6A
CYP2W1	RABEP2
CYP4F22	RAC1
DACT2	RAP2B
DCHS2	RBKS
DCT	RBM34
DHDH	RCBTB1
DHRS7C	REXO1L1P
DIO3OS	RHOA
DKFZP434K028	RHOT2
DLG2	RING1
DLG5-AS1	RNF187
DLGAP3	RPL41
DLX2	RPLP2
DMRTA2	RPS14
DNAH10	RPS17
DNAH5	RTN3
DOC2A	SCARF1
DOK6	SEC24D
DPP6	SEC63
DPYSL5	SETD5
DRD2	SETD7
DSCAML1	SF1
DUSP26	SGMS1
ECEL1	SLC10A7
EFR3B	SLC30A7
ELF5	SLC7A1
ELSPBP1	SMG5
ENDOV	SNORA68
ENHO	SNORA71A
EPM2A	SNTB2
EPO	SOX18
EXD3	SPANXB1
EXTL1	SPRY3
F2	SPSB3
FAM178B	SPTAN1
FAM217A	SPTBN1
FAM222A-AS1	SRCAP
FAM71A	SRSF4
FAM71F1	SSR1
FBN3	STAC
FBP2	STK19
FBXL18	STK4
FBXO24	TAF10
FEV	TLN1
FGF17	TMED3
FGF23	TMEM165
FGF6	TMEM39A
FHAD1	TNKS2
FLJ11710	TOR1AIP1
FLJ31713	TRIM5
FLRT1	TSC22D2
FNDC5	TTBK2
FOXH1	TTLL4
FOXN4	TWF1
FRMPD4	UBA6
FRRS1L	UBALD1
FSD2	UBR4
FTCD	USP22
FUT9	VPS52
FXYD4	VPS53
GABRA3	VWA1
GALNT9	WNK1
GAS2L2	YME1L1
GATA1	YTHDC1
GATA4	YWHAH
GBX1	ZBTB12
GCK	ZC3H18
GDNF	ZC3H7B
GFAP	ZMYM2
GH2	ZMYM5
GHRHR	ZNF208
GJA8	ZNF28
GLI1	ZNF417
GLP1R	ZNF460
GNAZ	ZNF620
GOLGA6L2	ZNF626
GOLGA7B	ZNF665
GP9	ZNF746
GPC2	CCR7
GPR12	CD27
GPR45	CD38
GPR6	CD79A
GPX5	EVI2B
GRIN2C	IL10RA
GUCA1A	PLA2G7
HAP1	PNOC
HAPLN2	RASGRP1
HCN2	SLAMF7
HCN4
HGC6.3
HHLA1
HOXC11
HOXC12
HPCA
HRC
HRG
HRH3
HSD11B1L
HTR1E
HTR3B
HTR3C
IFITM10
IFNA2
IFNB1
IFNL1
IGF2BP1
IL17C
IL1RAPL1
IL25
IQCF1
IQSEC2
ITGA2B
JPH3
KCNA1
KCNA4
KCNA6
KCNAB1
KCNG4
KCNH3
KCNH5
KCNH6
KCNH7
KCNIP3
KCNJ5
KCNK16
KCNK4
KCNK7
KCNS2
KCTD19
KDM8
KIAA1656
KIAA1683
KIF1A
KIF6
KIF7
KLC3
KLHDC8A
KLHL1
KLHL31
KLK2
KLK3
KLK4
KNDC1
KRT24
KRT73
KRT74
KRT78
KRT81
KRT83
L3MBTL1
LCN12
LDB3
LHX1
LHX4
LILRA4
LINC00208
LINC00319
LINC00521
LINC00656
LINC00661
LINC01260
LINC01366
LOC100130872
LOC440792
LOC554174
LRP2
LRP3
LRRC45
LRTM2
LY6G6C
LYZL4
MAATS1
MAGEB3
MAGEC2
MAP6D1
MAPK15
MAPK4
MAPT
MASP2
MAT1A
MATN1
MATN4
MBD3L1
MBLAC1
MESP2
MIR194-2
MMD2
MMP24
MOBP
MORN1
MOV10L1
MPL
MPP2
MRAP
MRO
MROH2B
MTUS2-AS1
MYADML2
MYH6
MYL7
MYO15A
MYOD1
MYOM1
NDOR1
NDST4
NEUROD4
NGFR
NKD1
NKX2-1
NKX2-5
NLRP8
NODAL
NPAS1
NPAS3
NPC1L1
NPPB
NPR3
NPTX1
NPTXR
NR6A1
NRAP
NTRK3
NUTM1
OBP2A
OBSCN
OBSL1
OGDHL
OPCML
OPN4
OPN5
OPRM1
OPTC
OR2K2
OR51B2
OR5L2
OTUD7A
OXT
P2RX2
PADI1
PAEP
PAGE5
PAX3
PDHA2
PDYN
PERM1
PGR
PHKG1
PHYHIP
PIANP
PIN1P1
PKLR
PKP1
PLAC9
PLEKHG4B
PLK5
PLSCR1
PNLDC1
PNLIPRP1
PNMA3
PP2672
PPBPP2
PPP1R17
PPP2R2C
PRKACG
PRKCG
PRMT8
PRND
PRODH2
PRR22
PRSS53
PTH1R
PTPRT
PURG
QRICH2
RAET1E
RASGEF1C
RBP3
RBPJL
RD3
REEP2
REG3G
RGS11
RHBDD3
RHBDL3
RHBG
RHCG
RHO
RIBC1
RND2
RNF151
RPGRIP1
RTP3
RYR1
SCTR
SERHL2
SERPINA10
SERPINA4
SEZ6
SFRP5
SFTPC
SH2D5
SHISA7
SHOX2
SIGLECL1
SLAMF9
SLC12A1
SLC13A4
SLC1A7
SLC22A7
SLC25A18
SLC25A41
SLC25A47
SLC26A1
SLC27A5
SLC28A1
SLC30A2
SLC5A10
SLC6A15
SLC6A5
SLC9A5
SLIT1
SLITRK2
SMTNL2
SNCB
SNCG
SNTA1
SNX32
SOAT2
SORBS3
SOX15
SOX2
SPAG8
SPATA21
SPATC1
SPEF1
SPRR4
SPSB4
SPTBN4
SRMS
SRRM4
SRY
SSPO
SSR4P1
ST8SIA5
STH
STMN4
SUN5
SYP
SYT15
T
TAS1R1
TBX6
TCTE3
TENM2
TEX101
TGM5
THAP3
TIGD5
TLE6
TMC1
TMEM105
TMEM151B
TMEM198
TMEM207
TMEM225
TMEM239
TMEM40
TMEM75
TNN
TNP1
TP53TG5
TREH
TRIM50
TRIP12
TRPM3
TRPM5
TRPV5
TSNARE1
TSSK1B
TSSK6
TTC21A
TTC25
TTC6
TTC9B
TULP1
UGGT1
UPB1
USHBP1
USP29
VENTX
VRTN
VSX1
VWA3A
VWA5B2
WDR38
WFDC13
WFDC8
WFDC9
WIPF3
WNT7B
WNT8A
WSCD2
ZAN
ZC3H12B
ZCCHC13
ZFHX2
ZFHX4
ZFP2
ZMYND10
ZNF324B
ZNF396
ZNF696
ZNF821
ZNF99
ZSCAN2
